# Supplementary material for: Effects of the lysosomal destabilizing drug siramesine on glioblastoma in vitro and in vivo
Source: Springer Nature journal article supplement (doi:10.1186/s12885-017-3162-3), 2017-03-07
Supplement: MOESM1 [file 12126912]

S1 Table EC50 values obtained using WST-1 and LDH assays

| <b>Cell line/Time</b> | <b>24 hours</b>                                       | <b>48 hours</b>                                       |
|-----------------------|-------------------------------------------------------|-------------------------------------------------------|
|                       | <b>WST-1 assay/LDH assay</b><br><br>( $\mu\text{M}$ ) | <b>WST-1 assay/LDH assay</b><br><br>( $\mu\text{M}$ ) |
| U87                   | 15.3/23.3                                             | 9.2/14.9                                              |
| U251                  | 19.2/-                                                | 15.6/-                                                |
| T98G                  | 19.3/24.3                                             | 11.3/14.2                                             |
| A172                  | 12.6/24.7                                             | 8.7/14.9                                              |
